# Supplementary material
Source: PubMed Central journal article supplement (PMC6644070)
Supplement: NIHMS1041602-supplement-Flow_Diagram.pdf [file NIHMS1041602-supplement-Flow_Diagram.pdf]

**Appendix**  
**Parent eReferral to Tobacco Quitline: A Pragmatic Randomized Trial in Pediatric Primary Care**  
**Jensen et al.**

**Appendix Figure 1.** Patient flow through study.

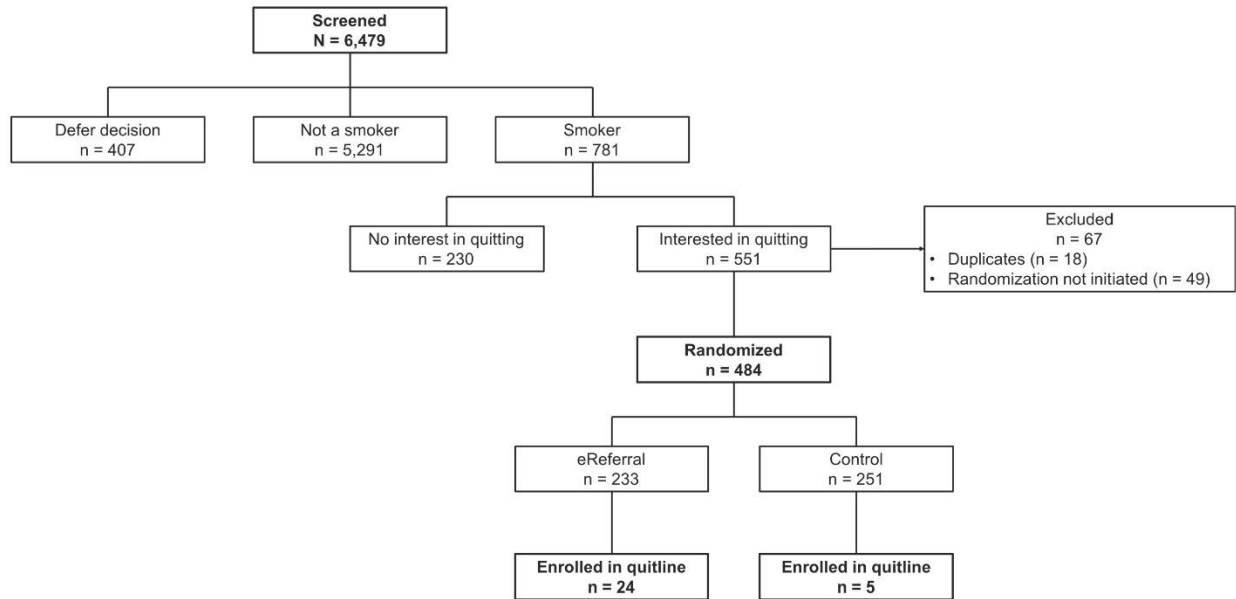

*Notes:* Pediatric clinicians screened for parent smokers and would offer treatment if the parent smoker was interested in quitting. They could also defer the decision to a later time. Randomization was not initiated for 49 parent smokers, meaning the pediatric clinician initiated the clinical decision support tool to screen for tobacco use and potentially offer treatment to the parent but did not complete all the appropriate steps to create the referral to the quitline.
